# Supplementary material for: Is Parental Attachment Security Contextual? Exploring Context-Specific Child-Parent Attachment Patterns and Psychological Well-Being in Taiwanese Youths
Source: Preprints.org preprint supplement (doi:10.20944/preprints201903.0013.v1), 2019-03-01
Supplement: Supplementary file 1 [file supplementary]

**Appendix A**

All final items and CFA factor loadings of CAS-S and CAS-A (study 2)

| Factors | Security | Insecurity |
| --- | --- | --- |
| **Items in CAS-S** |  |  |
| 1. I feel secure and close to my parent in sport | .73 |  |
| 2. When participating in sport, I feel like my parent cares about me | .82 |  |
| 3. When participating in sport, I feel relaxed knowing that my parent is always there for me | .67 |  |
| 4. In sport, I feel as though my parent pushes me away when I need to share my feelings |  | .68 |
| 5. In sport, my parent makes me feel as though I cannot talk about my feelings with her/him |  | .78 |
| 6. I feel as though I cannot talk my sport-related feelings over with my parent |  | .80 |
| 7. When participating in sport, I find it difficult to confide in my parent |  | .56 |
| **Items in CAS-A** |  |  |
| 1. When participating in my school-related activities, I can feel my parent’s love | .84 |  |
| 2. I feel secure and close to my parent in my school life | .88 |  |
| 3. I feel like my parent cares about my school life | .73 |  |
| 4. When participating in my school-related activities, I feel relaxed knowing that my parent is always there for me | .71 |  |
| 5. I feel as though I cannot talk my feelings about studying over with my parent |  | .74 |
| 6. When participating in school-related activities, the idea of being emotionally close to my parent makes me nervous |  | .60 |
| 7. When doing my schoolwork, I have mixed feelings about being emotionally close to my parent |  | .41 |
| 8. I often get into arguments with my parent when we talk about my schoolwork |  | .58 |
